# Supplementary material for: Preparation and characterization of transparent polymeric electrolyte containing ionic liquid with long alkyl chains for electroactive polymers
Source: Royal Society of Chemistry journal article supplement (doi:10.1039/d2tc04685g), 2023-01-01
Supplement: d2tc04685g1.pdf [file d2tc04685g1.pdf]

## Supplementary Information

### Preparation and Characterization of Transparent Polymeric Electrolyte Containing Ionic Liquid with Long Alkyl Chains for Electroactive Polymers

Yuqing Dong<sup>a</sup>, Ka-Wai Yeung<sup>a</sup>, Chak-Yin Tang<sup>a\*</sup>, Chi Ho Wong<sup>a</sup>, Wing-Cheung  
Law<sup>a</sup>, Gary Chi-Pong Tsui<sup>a</sup>, Xiaolin Xie<sup>b</sup>

<sup>a</sup> *Department of Industrial and Systems Engineering, The Hong Kong Polytechnic  
University, Hong Kong, China*

<sup>b</sup> *School of Chemistry and Chemical Engineering, Huazhong University of Science  
and Technology, Wuhan, Hubei 430074, China*

\* Corresponding authors

Email address: cy.tang@polyu.edu.hk (Chak Yin Tang), Phone: +852 2766 6608, Fax:  
+ 852 2362 5267

Postal address: Department of Industrial and Systems Engineering, The Hong Kong  
Polytechnic University, Hung Hom, Kowloon, Hong Kong, China.

#### 1. Performance comparison of iEAPs containing IL

We found that water plays a major role in the actuation performance of the PVA/IL-based iEAPs. For the dehydrated iEAP samples, no obvious deformation was observed (except for PL5-5), due to the constraints of the high viscosity, the large molecular size of C<sub>10</sub>MIMCl, and a small actuation voltage (2V). The deformation comparison of IL contained iEAPs is summarized in Table S1. The structures of materials in Table S1 are shown in Figure S1.

**Table S1.** Performance comparison of typical IL-containing iEAPs

| Electrolyte composition                              | Mobile ion                                                        | Bending direction | Actuation voltage (V) | Average curvature ( $m^{-1}$ ) | Reference |
|------------------------------------------------------|-------------------------------------------------------------------|-------------------|-----------------------|--------------------------------|-----------|
| PVDF/<br>C <sub>10</sub> MIMCl                       | C <sub>10</sub> MIM <sup>+</sup><br>& Cl <sup>-</sup>             | anode             | 10                    | ~1.00                          | [1]       |
| Nafion/ C <sub>4</sub> MIMCl                         | C <sub>4</sub> MIM <sup>+</sup>                                   | anode             | 4                     | ~5.06                          | [2]       |
| Nafion/ C <sub>2</sub> MIMTf                         | C <sub>2</sub> MIM <sup>+</sup>                                   | anode             | 2.5                   | 3.82                           | [3]       |
| BC/C <sub>2</sub> MIMBF <sub>4</sub>                 | C <sub>2</sub> MIM <sup>+</sup>                                   |                   | 1                     | ~6.60                          |           |
| BC/<br>C <sub>2</sub> MIMBF <sub>4</sub> /MW<br>CNT  | C <sub>2</sub> MIM <sup>+</sup>                                   | anode             | 1<br>1.5              | ~12.50<br>16.47                | [4]       |
| Cellulose/<br>C <sub>4</sub> MIMCl                   | Cl <sup>-</sup>                                                   | cathode           | 2<br>5                | ~4.42<br>~24.95                | [5]       |
| Nafion/LiCl/<br>C <sub>2</sub> MIMBF <sub>4</sub>    | Li <sup>+</sup> &<br>C <sub>2</sub> MIM <sup>+</sup>              | anode             | 2                     | ~15.13                         | [6]       |
| Nafion/<br>C <sub>2</sub> MIMBF <sub>4</sub>         | C <sub>2</sub> MIM <sup>+</sup>                                   |                   |                       | ~2.66                          |           |
| Nafion/<br>C <sub>2</sub> MIMBF <sub>4</sub>         | C <sub>2</sub> MIM <sup>+</sup>                                   | anode             | 2                     | ~2.15                          | [7]       |
| Nafion/ C <sub>4</sub> MIMCl                         | C <sub>2</sub> MIM <sup>+</sup>                                   | anode             | 2<br>5                | ~2.44<br>~9.89                 | [8]       |
| CBC/<br>C <sub>2</sub> MIMBF <sub>4</sub> /MW<br>CNT | C <sub>2</sub> MIM <sup>+</sup><br>& BF <sub>4</sub> <sup>-</sup> | anode             | 1                     | 12.05                          | [9]       |
| MFC/ C <sub>2</sub> MIMBF <sub>4</sub>               | C <sub>2</sub> MIM <sup>+</sup><br>& BF <sub>4</sub> <sup>-</sup> | anode             | 2                     | 12.40                          | [10]      |
| CA/<br>C <sub>4</sub> MIMBF <sub>4</sub> /GN         | C <sub>4</sub> MIM <sup>+</sup><br>& BF <sub>4</sub> <sup>-</sup> | anode             | 3                     | 14.18                          | [11]      |
| PL5-5-0<br>PL5-5-19.80                               | Cl <sup>-</sup>                                                   | cathode           | 2                     | 5.17<br>40.53                  | this work |

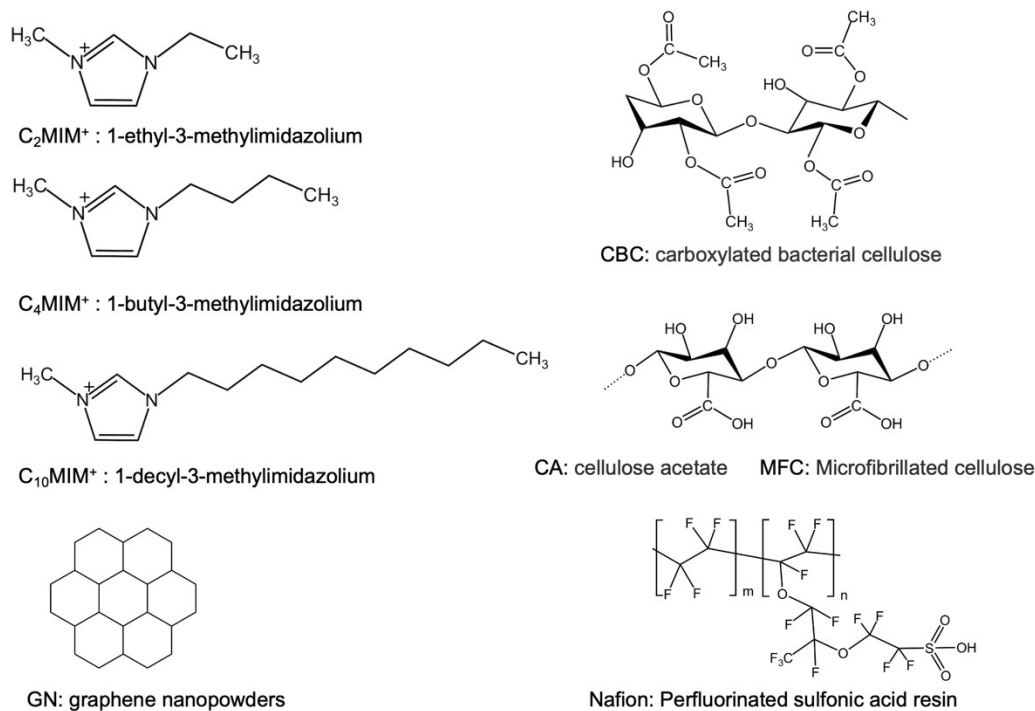

**Figure S1.** Structures of IL cations, filler, and polymer matrix

## References

- [1] R. Mejri, J. Dias, S.B. Hentati, G. Botelho, J. Esperança, C. Costa, S Lanceros-Mendez, *Eur. Polym. J.*, 2016, 85, 445-51.
- [2] R. Gonçalves, K. Tozzi, M. Saccardo, A. Zuquello, C. Scuracchio, *J Solid State Electrochem.*, 2020, 24, 1845-56.
- [3] Y. Bae, M. Park, M. Kim, S. Hwang, S. Kim, M. Jeon, *Thin Solid Films*, 2020, 698, 136848.
- [4] Y.F. Wang, F. Wang, Y. Kong, L. Wang, Q.C. Li, *Smart Mater. Struct.*, 2022, 31, 025023
- [5] Z.Z. Sun, L. Yang, D. Zhang, W.L. Song, *Sens. Actuators B Chem.*, 2019, 283, 579-589.
- [6] Lee, S., Hwang, L., Lee, J. Y., Yang, T., Jho, J. Y., Park, J. H., *Sens. Actuators B Chem.*, 2022, 372, 132616.
- [7] Wang, H. S., Cho, J., Park, H. W., Jho, J. Y., Park, J. H., *J. Ind. Eng. Chem.*, 2021, 96, 194-201.
- [8] Tozzi, K. A., Gonçalves, R., Barbosa, R., Saccardo, M. C., Zuquello, A., Sgreccia,

E., di Vona, M. L., *J. Appl. Electrochem.*, 2022, 1-15.

[9] Wang, F., Wang, L., Wang, Y., Wang, D., *Appl. Phys. A*, 2022, 128(10), 1-12.

[10] Wang, F., Kong, Y., Shen, F., Wang, Y., Wang, D., Li, Q., *Compos. Part B-Eng.*, 2022, 228, 109436.

[11] Nan, M., Wang, F., Kim, S., Li, H., Jin, Z., Bang, D., Choi, E., *Sens. Actuators B Chem.*, 2019, 301, 127127.
